# Supplementary material
Source: PubMed Central journal article supplement (PMC3714573)
Supplement: supp_fj.13-229666_13-229666SuppData.pdf [file supp_fj.13-229666_13-229666SuppData.pdf]

## Supplemental data

### Supplemental Material and Method

**Negative Stain Electron Microscopy.** A $\beta$  oligomer mixtures (see *Materials and Methods, Preparation of A $\beta$  oligomer mixtures and ELISA quantification*, in the main text.) were spread on formvar-carbon coated nickel slot grids (FCF2010-Ni; Electron Microscopy Sciences, Hatfield, PA), negatively stained with 2% (w/v) phosphotungstic acid, pH 7.0 (Wako Pure Chemical Industries, Osaka, Japan), and viewed in an electron microscope with an ATM digital camera (JEOL JEM-1011; JEOL USA, Inc., Peabody, MA), as described (1).

### Supplemental Figure 1

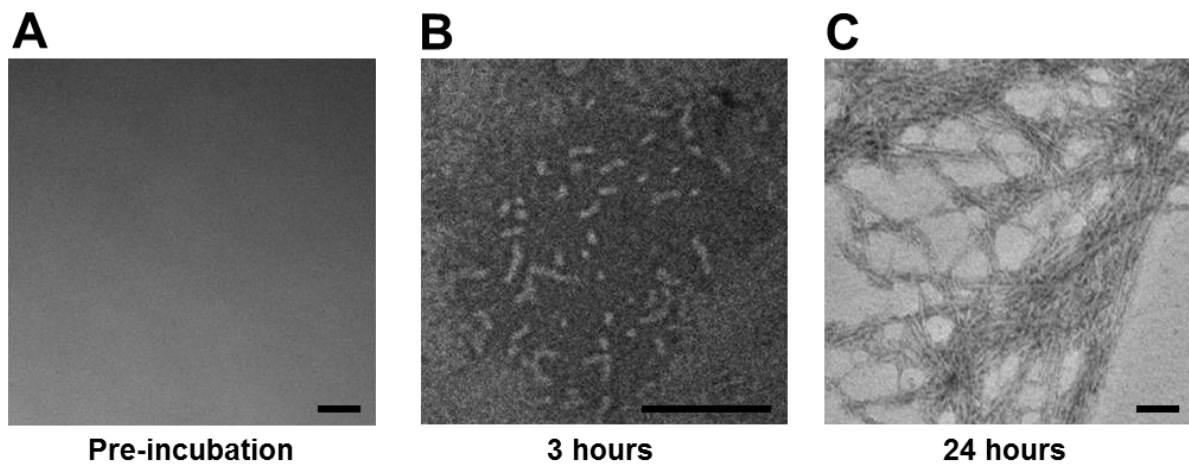

**Figure S1. Electron micrograph image of A $\beta$  oligomer mixtures.**

(A–C) Electron micrograph of negatively stained synthetic human A $\beta$ 1-42 (0.1 mg/ml) of pre-incubation (A), after incubation at 37 °C for three (B) and 24 (C) hours. (B) After three hours incubation, short and curved protofibrils were observed. (C) Long and straight fibril formation was observed after 24 hours of incubation. Scale bar = 100 nm.

Supplemental Figure 2

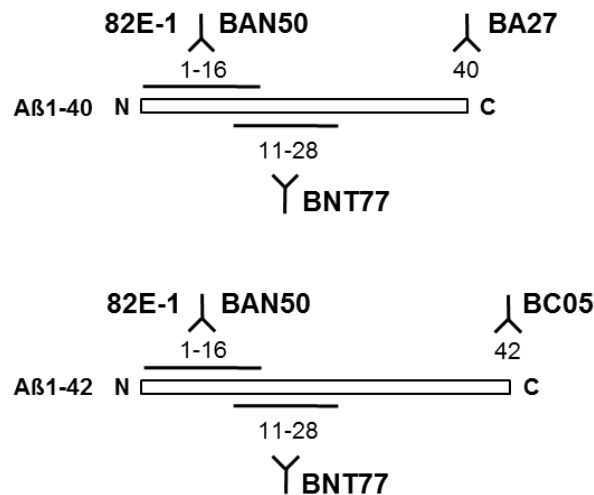

**Figure S2. Epitopes recognized by each anti-A $\beta$  antibody.**

Epitopes recognized by each anti-A $\beta$  monoclonal antibody (82E1, BAN50, BNT77, and BA27) used in this study. 82E-1 and BAN50 recognize N-terminal (residues 1-16) of human A $\beta$  peptide. BNT77 is a monoclonal antibody against human A $\beta$ 11-28, which could also recognize murine A $\beta$ . BA27 and BC05 are end-specific monoclonal antibodies which recognize C-terminus of A $\beta$ 40 and A $\beta$ 42, respectively.

Supplemental Figure 3

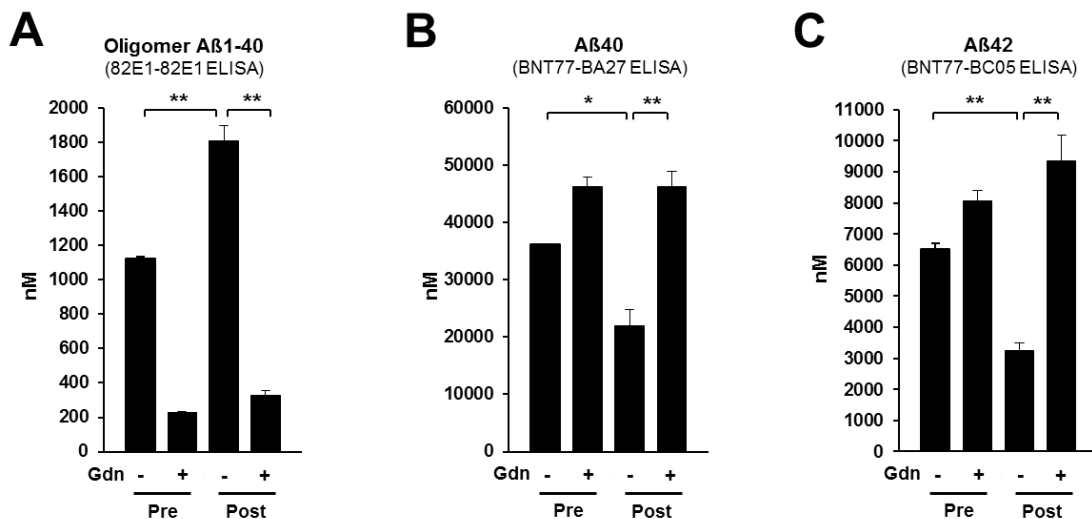

**Figure S3. BNT77-BA27 and BNT77-BC05 ELISA preferentially detect monomer (or LMW) A $\beta$ .**

(A–C) An A $\beta$  oligomer mixture was prepared by incubating synthetic human A $\beta$ 1-40 (0.2 mg/ml) for 24 hours at 37 °C or A $\beta$ 1-42 (0.1 mg/ml) for 3 hours at 37 °C. Concentrations of A $\beta$  in pre- and post-incubation samples were measured by 82E1-82E1 A $\beta$  oligomer-specific ELISA (for oligomer A $\beta$ 1-40 (A), BNT77-BA27 ELISA (for A $\beta$ 40, (B)) and BNT77-BC05 ELISA (for A $\beta$ 42, (C)). Samples were treated with and without guanidine HCl before ELISA measurement. ( $n = 3-5/$  group); \* $P < 0.05$ , \*\* $P < 0.01$ . Gdn, guanidine HCl.

### Supplemental Figure 4

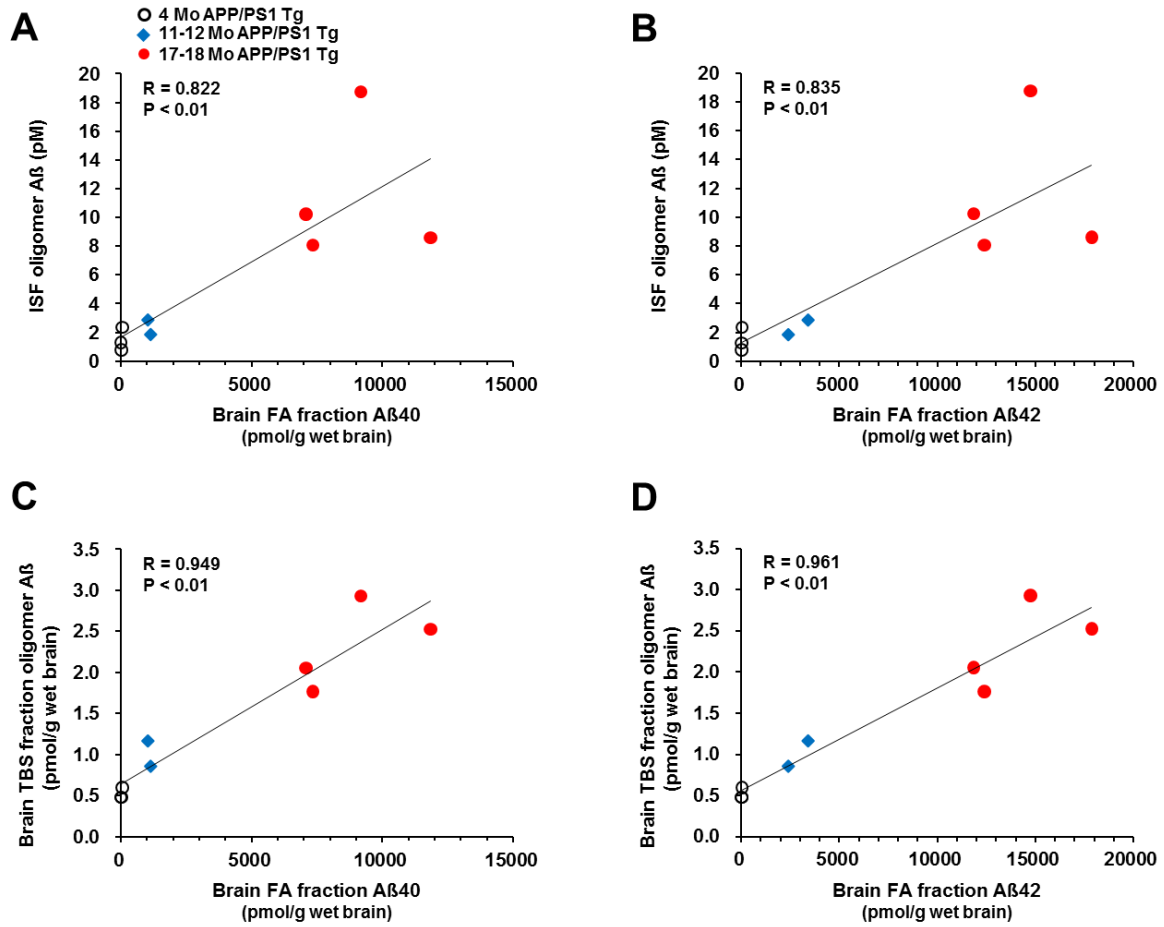

**Figure S4. Correlations of brain ISF and TBS fraction A $\beta$  oligomers with FA fraction A $\beta$  levels.**

(A, B) The levels of ISF A $\beta$  oligomers (detected by 82E1-82E1 ELISA) positively correlate with the levels of brain FA fraction A $\beta$ 40 (A) and A $\beta$ 42 (B). (C, D) Brain TBS-soluble A $\beta$  oligomer levels (82E1-82E1 ELISA) positively correlated with the levels of brain FA fraction A $\beta$ 40 (C) and A $\beta$ 42 (D). ( $n = 9$ , 4–18 Mo old animals)  $P < 0.01$ , Spearman rank test. Concentrations of A $\beta$  in brain FA fractions were measured by BNT77-BA27 ELISA (for A $\beta$ 40, (A, C)) and BNT77-BC05 ELISA (for A $\beta$ 42, (B, D)).

## Supplemental Figure 5

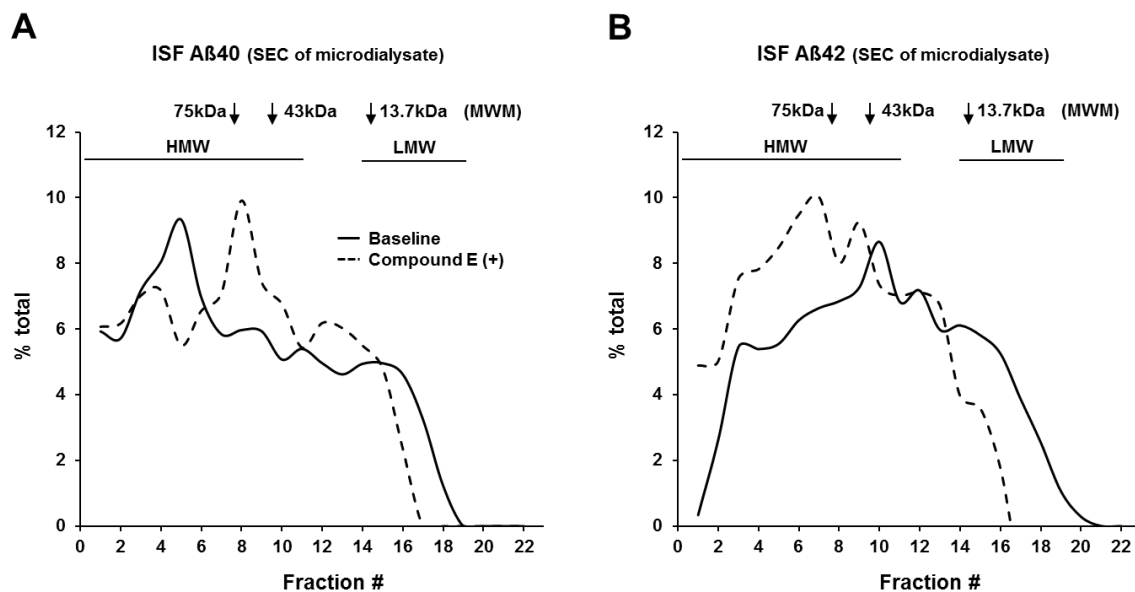

**Figure S5. Change in distribution of ISF A $\beta$  between before and after Compound E treatment.**

Levels of ISF A $\beta$  in each fraction in Fig. 4, the main text, were normalized to total pM value under each curve [sum of A $\beta$  values (pM) of fractions #1–22] and expressed as “% total” value, which shows differences in molecular weight distribution of ISF A $\beta$ 40 (A) and A $\beta$ 42 (B) between before (solid line) and after (dashed line) the Compound E treatment (averaged values of three 17–18 month-old APP/PS1 Tg mice were shown). The distribution of ISF A $\beta$  shifted to higher molecular weight fractions after Compound E treatment. HMW, high molecular weight; LMW, low molecular weight; MWM, molecular weight marker.

### Reference

Hori, Y., Hashimoto, T., Wakutani, Y., Urakami, K., Nakashima, K., Condrón, M. M., Tsubuki, S., Saido T. C., Teplow, D. B., Iwatsubo, T. (2007) The Tottori (D7N) and English (H6R) Familial Alzheimer Disease Mutations Accelerate A $\beta$  Fibril Formation without Increasing Protofibril Formation. *J. Biol. Chem.* **282**, 4916-4923
